# Supplementary material for: Lost Earnings and Nonmedical Expenses of Pediatric Hospitalizations
Source: Oxford University Press journal article supplement (doi:10.1542/peds.2018-0195), 2018-08-13
Supplement: peds_20180195supplementarydata.pdf [file peds_20180195supplementarydata.pdf]

## Supplemental Information

**SUPPLEMENTAL TABLE 5** Sample Characteristics Between Those Who Required Extrapolation of the Calculated TCB and Those Who Did Not Require Extrapolation

| Characteristics                           | Nonextrapolated Sample, <i>n</i> (%) | Extrapolated Sample, <i>n</i> (%) | <i>P</i> <sup>a</sup> |
|-------------------------------------------|--------------------------------------|-----------------------------------|-----------------------|
| All                                       | 610 (44.4)                           | 762 (55.6)                        | —                     |
| Child                                     |                                      |                                   |                       |
| Age, y                                    |                                      |                                   | .72                   |
| <3                                        | 336 (55.1)                           | 436 (57.2)                        | —                     |
| 3–10                                      | 153 (25.1)                           | 184 (24.2)                        | —                     |
| >10                                       | 121 (19.8)                           | 142 (18.6)                        | —                     |
| Race                                      |                                      |                                   | .76                   |
| White                                     | 369 (61.3)                           | 464 (61.6)                        | —                     |
| African American                          | 205 (34.1)                           | 260 (34.5)                        | —                     |
| Other                                     | 28 (4.6)                             | 29 (3.9)                          | —                     |
| Primary insurer                           |                                      |                                   | .02                   |
| Private                                   | 242 (39.7)                           | 353 (46.3)                        | —                     |
| Public or self-pay                        | 368 (60.3)                           | 409 (53.7)                        | —                     |
| Length of stay, d                         |                                      |                                   | <.01                  |
| 0–1                                       | 211 (34.6)                           | 14 (1.8)                          | —                     |
| 2–3                                       | 344 (56.4)                           | 480 (63.0)                        | —                     |
| >3                                        | 55 (9.0)                             | 268 (35.2)                        | —                     |
| Parent                                    |                                      |                                   |                       |
| Women                                     | 548 (89.8)                           | 685 (89.9)                        | .99                   |
| Marital status                            |                                      |                                   | .40                   |
| Single, widowed, separated, or divorced   | 246 (40.3)                           | 289 (37.9)                        | —                     |
| Married or living with partner            | 364 (59.7)                           | 473 (62.1)                        | —                     |
| Education less than college degree        | 436 (71.6)                           | 565 (74.2)                        | .32                   |
| No. parents employed                      |                                      |                                   | .51                   |
| 0                                         | 78 (45.7)                            | 93 (54.4)                         | —                     |
| 1–2                                       | 259 (46.1)                           | 304 (54)                          | —                     |
| ≥3                                        | 273 (42.8)                           | 365 (57.3)                        | —                     |
| Type of parent employment                 |                                      |                                   |                       |
| 1 working parent, full-time               | 44 (7.2)                             | 52 (6.8)                          | .98                   |
| 1 working parent, part-time               | 26 (4.3)                             | 29 (3.8)                          | —                     |
| >1 working parent, ≥2 full-time           | 180 (29.5)                           | 234 (30.7)                        | —                     |
| >1 working parent, 1 full-time            | 248 (40.7)                           | 308 (40.4)                        | —                     |
| >1 working parent, no full-time           | 112 (18.4)                           | 139 (18.2)                        | —                     |
| Work flexibility                          | 466 (76.8)                           | 606 (79.6)                        | .44                   |
| Household                                 |                                      |                                   |                       |
| Adults in the household                   |                                      |                                   | .49                   |
| 1                                         | 132 (21.6)                           | 145 (19.0)                        | —                     |
| 2                                         | 372 (61.0)                           | 479 (62.9)                        | —                     |
| ≥3                                        | 106 (17.4)                           | 138 (18.1)                        | —                     |
| Children in the household                 |                                      |                                   | .23                   |
| 1                                         | 152 (25.2)                           | 178 (23.4)                        | —                     |
| 2                                         | 201 (33.3)                           | 287 (37.8)                        | —                     |
| ≥3                                        | 251 (41.6)                           | 295 (38.8)                        | —                     |
| Household income                          |                                      |                                   | .34                   |
| <\$15 000                                 | 134 (22.1)                           | 156 (20.5)                        | —                     |
| \$15 000–\$29 999                         | 118 (19.5)                           | 132 (17.4)                        | —                     |
| \$30 000–\$44 999                         | 67 (11.1)                            | 117 (15.4)                        | —                     |
| \$45 000–\$59 999                         | 69 (11.4)                            | 80 (10.5)                         | —                     |
| \$60 000–\$89 999                         | 86 (14.2)                            | 99 (13.0)                         | —                     |
| \$90 000–\$119 999                        | 54 (8.9)                             | 73 (9.6)                          | —                     |
| ≥\$120 000                                | 78 (12.9)                            | 103 (13.6)                        | —                     |
| Reported financial hardships <sup>b</sup> |                                      |                                   |                       |
| 0                                         | 190 (31.2)                           | 236 (31.0)                        | .71                   |
| 1–2                                       | 209 (34.3)                           | 276 (36.2)                        | —                     |
| ≥3                                        | 211 (34.6)                           | 250 (32.8)                        | —                     |
| Reported social hardships <sup>c</sup>    |                                      |                                   | .94                   |
| 0                                         | 379 (62.4)                           | 472 (62.1)                        | —                     |
| 1–2                                       | 228 (37.6)                           | 288 (37.9)                        | —                     |

—, not applicable.

<sup>a</sup> *P* value assesses whether there are differences between those who required extrapolation compared with those who did

**TABLE 5** Continued

not require extrapolation in the calculation of the cost burden outcomes (calculated by using  $\chi^2$  test).

<sup>b</sup> Questions were related to the following: difficulty making ends meet, unable to find work, unable to pay rent or mortgage, unable to pay utilities, does not own a home, does not own a car, borrowed money, or moved in with others.

<sup>c</sup> Questions were related to the following: little or no help from family or friends if needed or cannot get a \$1000 loan if needed.

**SUPPLEMENTAL TABLE 6** TCB Based on Different Survey to Discharge Time Extrapolation Cutoffs

| Characteristics                           | TCB 4 h Cutoff,<br>Median (IQR), \$ | <i>P</i> <sup>a</sup> | TCB 12 h Cutoff,<br>Median (IQR), \$ | <i>P</i> <sup>a</sup> |
|-------------------------------------------|-------------------------------------|-----------------------|--------------------------------------|-----------------------|
| All                                       | 120 (42.9–342.1)                    | —                     | 108.1 (40–310.3)                     | —                     |
| Child                                     |                                     |                       |                                      |                       |
| Age, y                                    |                                     | <.01                  |                                      | <.01                  |
| <3                                        | 106.7 (37.9–318.4)                  | —                     | 93.5 (34.1–291.3)                    | —                     |
| 3–10                                      | 135 (48.6–390.3)                    | —                     | 123 (41–355)                         | —                     |
| >10                                       | 124.6 (52.3–366.1)                  | —                     | 111.3 (46.7–336.6)                   | —                     |
| Race                                      |                                     | <.01                  |                                      | <.01                  |
| White                                     | 130 (50–362.8)                      | —                     | 120 (45–320)                         | —                     |
| African American                          | 99.2 (33.1–321)                     | —                     | 89.4 (30–290.5)                      | —                     |
| Other                                     | 95.4 (47.1–342.1)                   | —                     | 88 (41.8–330)                        | —                     |
| Primary insurer                           |                                     | .17                   |                                      | .16                   |
| Private                                   | 116.6 (48.4–361.4)                  | —                     | 105 (42.1–330)                       | —                     |
| Public or self-pay                        | 123.4 (39.4–325.4)                  | —                     | 110.8 (35–297.3)                     | —                     |
| Parent                                    |                                     |                       |                                      |                       |
| Sex                                       |                                     | .45                   |                                      | .43                   |
| Female                                    | 120 (41.5–342.1)                    | —                     | 108 (39.1–311)                       | —                     |
| Male                                      | 120 (58.9–323.7)                    | —                     | 110 (52.5–305)                       | —                     |
| Marital status                            |                                     | <.01                  |                                      | <.01                  |
| Single, widowed, separated, or divorced   | 102.6 (32.8–320.6)                  | —                     | 95 (30–292.9)                        | —                     |
| Married or living with partner            | 127.3 (50–369.7)                    | —                     | 120 (45–331.7)                       | —                     |
| Education                                 |                                     | <.01                  |                                      | <.01                  |
| Less than a college degree                | 140.7 (45.3–370)                    | —                     | 130 (40–332.4)                       | —                     |
| College or graduate degree                | 79.3 (40–251.1)                     | —                     | 70 (36–230)                          | —                     |
| No. parents employed                      |                                     | <.01                  |                                      | <.01                  |
| 0                                         | 40 (20–90.7)                        | —                     | 37 (17.8–86.9)                       | —                     |
| 1–2                                       | 123.4 (45.7–337.2)                  | —                     | 120 (40.5–292.1)                     | —                     |
| ≥3                                        | 156.9 (55.1–431.1)                  | —                     | 141 (49.3–400)                       | —                     |
| Parent employment                         |                                     | <.01                  |                                      | <.01                  |
| 1 working parent, full-time               | 172.3 (59.7–370.4)                  | —                     | 160 (55.6–326.8)                     | —                     |
| 1 working parent, part-time               | 200 (48.6–343.7)                    | —                     | 180 (46–289.3)                       | —                     |
| >1 working parent, ≥2 full-time           | 140.2 (53–437.5)                    | —                     | 129.5 (47.8–409.2)                   | —                     |
| >1 working parent, 1 full-time            | 138.7 (48.5–356.5)                  | —                     | 128.4 (45–329.3)                     | —                     |
| >1 working parent, no full-time           | 54.1 (20.7–128.8)                   | —                     | 50 (20–117.7)                        | —                     |
| Work flexibility                          |                                     | <.01                  |                                      | <.01                  |
| Yes                                       | 130.1 (48.7–360.7)                  | —                     | 120 (42.9–322.3)                     | —                     |
| No                                        | 240.6 (69.4–522.1)                  | —                     | 214.7 (59.8–436.5)                   | —                     |
| Household                                 |                                     |                       |                                      |                       |
| Adults in the household                   |                                     | <.01                  |                                      | <.01                  |
| 1                                         | 95.4 (30–291)                       | —                     | 89.4 (26.9–259)                      | —                     |
| 2                                         | 120 (47.2–342.1)                    | —                     | 106 (41.8–317.8)                     | —                     |
| ≥3                                        | 144.4 (47.7–388.9)                  | —                     | 132.5 (42–356.3)                     | —                     |
| Children in the household                 |                                     | .43                   |                                      | .45                   |
| 1                                         | 110.6 (40–319.5)                    | —                     | 96.9 (35–303)                        | —                     |
| 2                                         | 124.5 (46.6–349.4)                  | —                     | 109.6 (40–319)                       | —                     |
| ≥3                                        | 120.7 (42.9–353.7)                  | —                     | 110 (40–324.7)                       | —                     |
| Household income, \$                      |                                     | <.01                  |                                      | <.01                  |
| <15 000                                   | 70.3 (24.9–201.3)                   | —                     | 63.5 (21.1–179.8)                    | —                     |
| 15 000–29 999                             | 162.5 (52.8–376.1)                  | —                     | 150.5 (47.1–335.4)                   | —                     |
| 30 000–44 999                             | 163.4 (64.1–454.7)                  | —                     | 141.4 (59.3–377)                     | —                     |
| 45 000–59 999                             | 144 (52.7–457.3)                    | —                     | 135 (47.8–400)                       | —                     |
| 60 000–89 999                             | 132.3 (50–435)                      | —                     | 125 (45–400)                         | —                     |
| 90 000–119 999                            | 84.2 (42.6–308.3)                   | —                     | 77 (40–284)                          | —                     |
| ≥120 000                                  | 95 (46.2–294.7)                     | —                     | 80.8 (40–265)                        | —                     |
| Reported financial hardships <sup>b</sup> |                                     | .09                   |                                      | .11                   |
| 0                                         | 98.5 (45.6–294.2)                   | —                     | 87.1 (40–270)                        | —                     |
| 1–2                                       | 145.7 (45–398.3)                    | —                     | 135 (37–347.9)                       | —                     |
| ≥3                                        | 116.8 (40–321.3)                    | —                     | 101.7 (37–293.6)                     | —                     |
| Reported social hardships <sup>c</sup>    |                                     | .22                   |                                      | .22                   |
| 0                                         | 109.3 (42.6–328.8)                  | —                     | 100 (40–303.7)                       | —                     |
| 1–2                                       | 134.6 (44.6–355.2)                  | —                     | 122.5 (40–330)                       | —                     |

**TABLE 6** Continued

—, not applicable.

<sup>a</sup> *P* value assesses whether there are differences between those who required extrapolation compared with those who did not require extrapolation in the calculation of the cost burden outcomes (calculated by using  $\chi^2$  test).

<sup>b</sup> Questions were related to the following: difficulty making ends meet, unable to find work, unable to pay rent or mortgage, unable to pay utilities, does not own a home, does not own a car, borrowed money, or moved in with others.

<sup>c</sup> Questions were related to the following: little or no help from family or friends if needed or cannot get a \$1000 loan if needed.
